# Supplementary material for: The Great Recession and subjective well-being: How did the life satisfaction of people living in the United Kingdom change following the financial crisis?
Source: PubMed Central journal article supplement (PMC6114278; doi:10.1371/journal.pone.0201215), 2018-08-29
Supplement: pone.0201215.s001.pdf [file pone.0201215.s001.pdf]

Copy of the Stata .do file for “The Great Recession and subjective well-being: How did the subjective well-being of people living in the United Kingdom change following the financial crisis?”

Data comes from the UK Data Service (ESRC data archive). Access requires registration.

DOI's for datasets used:

British Household Panel Survey - UKDA-5151

<http://doi.org/10.5255/UKDA-SN-5151-1>

Understanding Society - UKDA-6614

<http://doi.org/10.5255/UKDA-SN-6849-10>

### **Step 1: Merging original datasets and obtaining relevant variables**

```
use "C:\UKDA-5151-stata8\stata8\xwaveid.dta", clear
rename doby yearofbirth
rename dobm monthofbirth
keep pid phid qhid rhid sex monthofbirth yearofbirth
***//////// wave p //////////***
merge m:1 phid using "C:\UKDA-5151-stata8\stata8\phhresp.dta"
rename phid hid16
rename phsval hsevalue16
rename phscost hsecost16
rename pmgold mortgageamt16
rename pxpmg monthlymortloan16
rename pnkids children16
rename pfihhyr hhincome16
rename phhsize hhsizel6
rename pxphsdf hsepayprobs16
rename pxphsd1 hsepayborrow16
rename pxphsd2 hsepaycutbacks16
rename pxphsdb hsepaybehind16
rename pxphp loans16
rename pxphpdf loanburden16

keep pid-rhid hid16 hsevalue16 hsecost16 loanburden16 loans16 mortgageamt16
monthlymortloan16 hsepayprobs16 hsepayborrow16 hsepaycutbacks16 hsepaybehind16
hhincome16 children16 hhsizel6

merge 1:1 pid using "C:\UKDA-5151-stata8\stata8\pindresp.dta"

rename pfsit finsituation16
rename pfsitc finsituationchange16
rename psave saves16
rename psaved savesamt16
rename psavreg saveregular16
rename psavlt longtermsaver16
rename pfyri ivtincome16
rename pdoid dayofint16
rename pdoim monthofint16
```

rename pjbpic92 industry92\_16  
rename psmoker smoker16  
rename pncigs cigssmoked16  
rename pjbsoe occupation90\_16  
rename pjbsemp sfemp16  
rename phoh hoh16  
rename page age16  
rename pjshrs hrswrksemp16  
rename pjbttwt commutehrs16  
rename pregion region16  
rename ptenure hsetenancy16  
rename pqfachi education16  
rename pmlstat maritalstatus16  
rename phldsbl1 disable16  
rename pfiyr income16  
rename pjbstatt jobstatus16  
rename pjbhrs hrswrk16  
rename pjbot overtime16  
rename phlghq1 mental36hlth16  
rename phlghq2 mental12hlth16  
rename pjbsat jobsat16  
rename pjbsat2 paysat16  
rename pjbsat4 jobsecuritysat16  
rename pjbsat7 jobhrssat16  
rename phlstat subjhlth16  
rename plfsat1 hlthsat16  
rename plfsat2 hhincsat16  
rename plfsat3 flatsat16  
rename plfsat4 partnersat16  
rename plfsat5 job2sat16  
rename plfsat6 socialsat16  
rename plfsat7 leistimesat16  
rename plfsat8 leisusesat16  
rename plfsato lifesat16  
rename plfsatl lifelysat16  
rename pfrna neighbourchat16  
rename pfrnb meetingpeople16  
rename pfrnc spokeninlastwk16  
rename placta wlkswimsprt16  
rename plactb livesprt16  
rename plactc cinema16  
rename plactd theatre16  
rename placte eatout16  
rename plactf drinkout16  
rename placth garden16  
rename placti diygar16  
rename plactj eveclass16  
rename plactk attendgrps16  
rename plactl volunteer16  
rename pvote4 politicalparty16

```
rename pjbstatl jobstatusly16
rename pnjuwks unemployedwks16
rename pnjusp unemployedspells16
rename pnjbsp employedspells16
rename pnjbnew employeddiffemployers16
```

```
keep pid-hhincome16 employeddiffemployers16 employedspells16 unemployedspells16
unemployedwks16 jobstatusly16 politicalparty16 dayofint16 longtermsaver16 saveregular16
monthofint16 saves16 savesamt16 ivtincome16 finsituation16 finsituationchange16
smoker16 cigssmoked16 hoh16 age16 region16 hsetenancy16 education16 maritalstatus16
disable16 jobstatus16 income16 hrswrk16 overtime16 commutehrs16 industry92_16
occupation90_16 sfemp16 hrswrksemp16 mental36hlth16 mental12hlth16 jobsat16 paysat16
jobsecuritysat16 jobhrssat16 subjhlth16 hlthsat16 hhincs16 flatsat16 partnersat16 job2sat16
socialsat16 leistimesat16 leisusesat16 lifesat16 lifelysat16 neighbourchat16 meetingpeople16
spokeninlastwk16 wlkswimsprt16 livesprt16 cinema16 theatre16 eatout16 drinkout16
garden16 diyar16 eveclass16 attendgrps16 volunteer16
```

```
***///// wave q /////***
```

```
merge m:1 qhid using "C:\UKDA-5151-stata8\stata8\qhhresp.dta"
```

```
rename qhid hid17
rename qhsval hsevalue17
rename qhscost hsecost17
rename qmgold mortgageamt17
rename qxpmg monthlymortloan17
rename qnkids children17
rename qfihhyr hhincome17
rename qhhsz hhsz17
rename qxphsdf hsepayprobs17
rename qxphsd1 hsepayborrow17
rename qxphsd2 hsepaycutbacks17
rename qxphsdb hsepaybehind17
rename qxphp loans17
rename qxphpdf loanburden17
```

```
keep pid-mental12hlth16 hid17 hsevalue17 hsecost17 loanburden17 loans17 mortgageamt17
monthlymortloan17 hsepayprobs17 hsepayborrow17 hsepaycutbacks17 hsepaybehind17
hhincome17 children17 hhsz17
```

```
merge 1:1 pid using "C:\UKDA-5151-stata8\stata8\qindresp.dta"
```

```
rename qfisit finsituation17
rename qfisitc finsituationchange17
rename qsave saves17
rename qsaved savesamt17
rename qsavreg saveregular17
rename qsavlt longtermsaver17
rename qfiyri ivtincome17
rename qdoid dayofint17
```

rename qdoim monthofint17  
rename qjbsic92 industry92\_17  
rename qsmoker smoker17  
rename qncigs cigssmoked17  
rename qjbsoc occupation90\_17  
rename qjbsemp sfemp17  
rename qhoh hoh17  
rename qage age17  
rename qjshrs hrswrksemp17  
rename qjbtwt commutehrs17  
rename qregion region17  
rename qtenure hsetenancy17  
rename qqfachi education17  
rename qmlstat maritalstatus17  
rename qhldsbl1 disable17  
rename qfiyr income17  
rename qjbstatt jobstatus17  
rename qjbhrs hrswrk17  
rename qjbot overtime17  
rename qhlghq1 mental36hlth17  
rename qhlghq2 mental12hlth17  
rename qjbsat jobsat17  
rename qjbsat2 paysat17  
rename qjbsat4 jobsecuritysat17  
rename qjbsat7 jobhrssat17  
rename qhlstat subjhlth17  
rename qlfsat1 hlthsat17  
rename qlfsat2 hhincsatsat17  
rename qlfsat3 flatsat17  
rename qlfsat4 partnersat17  
rename qlfsat5 job2sat17  
rename qlfsat6 socialsat17  
rename qlfsat7 leistimesat17  
rename qlfsat8 leisusesat17  
rename qlfsato lifesat17  
rename qlfsatl lifelysat17  
rename qfrna neighbourchat17  
rename qfrnb meetingpeople17  
rename qfrnc spokeninlastwk17  
rename qvote4 politicalparty17  
rename qjbstatl jobstatusly17  
rename qnjuwks unemployedwks17  
rename qnjusp unemployedspells17  
rename qnjbsp employedspells17  
rename qnjbnew employeddiffemployers17

keep pid-hhincome17 employeddiffemployers17 employedspells17 unemployedspells17  
unemployedwks17 jobstatusly17 politicalparty17 dayofint17 longtermsaver17 saveregular17  
monthofint17 saves17 savesamt17 ivtincome17 finsituation17 finsituationchange17  
smoker17 cigssmoked17 hoh17 age17 region17 hsetenancy17 education17 maritalstatus17

```
disable17 jobstatus17 income17 hrswrk17 overtime17 commutehrs17 industry92_17  
occupation90_17 sfemp17 hrswrksemp17 mental36hlth17 mental12hlth17 jobsat17 paysat17  
jobsecuritysat17 jobhrssat17 subjhlth17 hlthsat17 hhincsat17 flatsat17 partnersat17 job2sat17  
socialsat17 leistimesat17 leisusesat17 lifesat17 lifelysat17 neighbourchat17 meetingpeople17  
spokeninlastwk17
```

```
***///// wave r /////***
```

```
merge m:1 rhid using "C:\UKDA-5151-stata8\stata8\rhhresp.dta"
```

```
rename rhid hid18  
rename rhsval hsevalue18  
rename rhscost hsecost18  
rename rmgold mortgageamt18  
rename rxpmg monthlymortloan18  
rename nkids children18  
rename rfihhyr hhincome18  
rename rhhsz hhsz18  
rename rxphsdf hsepayprobs18  
rename rxphsd1 hsepayborrow18  
rename rxphsd2 hsepaycutbacks18  
rename rxphsdb hsepaybehind18  
rename rxphp loans18  
rename rxphpdf loanburden18
```

```
keep pid-mental12hlth17 hid18 hsevalue18 hsecost18 loanburden18 loans18 mortgageamt18  
monthlymortloan18 hsepayprobs18 hsepayborrow18 hsepaycutbacks18 hsepaybehind18  
hhincome18 children18 hhsz18
```

```
merge 1:1 pid using "C:\UKDA-5151-stata8\stata8\rindresp.dta"
```

```
rename rfisit finsituation18  
rename rfisite finsituationchange18  
rename rsave saves18  
rename rsaved savesamt18  
rename rsavreg saveregular18  
rename rsavlt longtermsaver18  
rename rfiyri ivtincome18  
rename rdoid dayofint18  
rename rdoim monthofint18  
rename rjbsic92 industry92_18  
rename rsmoker smoker18  
rename rncigs cigssmoked18  
rename rjbsoc occupation90_18  
rename rjbsemp sfemp18  
rename rhoh hoh18  
rename rage age18  
rename rjshrs hrswrksemp18  
rename rjbttwt commutehrs18  
rename rregion region18
```

rename rtenure hsetenancy18  
rename rqfachi education18  
rename rmlstat maritalstatus18  
rename rhldsbl1 disable18  
rename rfiyr income18  
rename rjbstatt jobstatus18  
rename rjbhrs hrswrk18  
rename rjbot overtime18  
rename rhlghq1 mental36hlth18  
rename rhlghq2 mental12hlth18  
rename rjbsat jobsat18  
rename rjbsat2 paysat18  
rename rjbsat4 jobsecuritysat18  
rename rjbsat7 jobhrssat18  
rename rhlstat subjhlth18  
rename rlfsat1 hlthsat18  
rename rlfsat2 hhincsat18  
rename rlfsat3 flatsat18  
rename rlfsat4 partnersat18  
rename rlfsat5 job2sat18  
rename rlfsat6 socialsat18  
rename rlfsat7 leistimesat18  
rename rlfsat8 leisusesat18  
rename rlfsato lifesat18  
rename rlfsatl lifelysat18  
rename rfrna neighbourchat18  
rename rfrnb meetingpeople18  
rename rfrnc spokeninlastwk18  
rename rlacta wlkswimsprt18  
rename rlactb livesprt18  
rename rlactc cinema18  
rename rlactd theatre18  
rename rlacte eatout18  
rename rlactf drinkout18  
rename rlacth garden18  
rename rlacti diygar18  
rename rlactj eveclass18  
rename rlactk attendgrps18  
rename rlactl volunteer18  
rename roprlg1 religion18  
rename rvote4 politicalparty18  
rename rjbstatl jobstatusly18  
rename rnjuwks unemployedwks18  
rename rnjusp unemployedspells18  
rename rnjbsp employedspells18  
rename rnjbnew employeddiffemployers18

keep pid-hhincome18 employeddiffemployers18 employedspells18 unemployedspells18  
unemployedwks18 jobstatusly18 politicalparty18 dayofint18 longtermsaver18 saveregular18  
monthofint18 saves18 savesamt18 ivtincome18 finsituation18 finsituationchange18

```
smoker18 cigssmoked18 hoh18 age18 region18 hsetenancy18 education18 maritalstatus18
disable18 jobstatus18 income18 hrswrk18 overtime18 commutehrs18 industry92_18
occupation90_18 sfemp18 hrswrksemp18 mental36hlth18 mental12hlth18 jobsat18 paysat18
jobsecuritysat18 jobhrssat18 subjhlth18 hlthsat18 hhincs18 flatsat18 partnersat18 job2sat18
socialsat18 leistimesat18 leisusesat18 lifesat18 lifelysat18 religion18 neighbourchat18
meetingpeople18 spokeninlastwk18 wlkswimsprt18 livesprt18 cinema18 theatre18 eatout18
drinkout18 garden18 diy18 diyclass18 attendgrps18 volunteer18
```

```
save "C:\BHPS Waves 16 to 18.dta", replace
```

```
*** UNDERSTANDING SOCIETY data - the 1st wave of US does not have BHPS
participants - begin with wave 2 -
*** nb ensure Understanding Society individual identifier for BHPS participants matches the
BHPS identifier - pid
```

```
use "C:\BHPS June 2015.dta", clear
```

```
merge 1:1 pid using "C:\xwaveid.dta"
```

```
*** WAVE B
```

```
drop pidp a_hidp a_pno a_ivfio a_ivfho b_pno b_ivfio b_ivfho c_pno c_ivfio c_ivfho d_pno
d_ivfio d_ivfho _merge
```

```
merge m:1 b_hidp using "C:\UKDA-6614-stata11_se\stata11_se\b_hhresp.dta"
```

```
rename b_hid hid19
rename b_hsval hsevalue19
rename b_hscost hsecost19
rename b_mgold mortgageamt19
rename b_xpmg monthlymortloan19
rename b_nkids_dv children19
rename b_fihhmngers_dv hhincomemonthly19
rename b_hhsize hhsize19
rename b_xphsdb hsepayprobs19
```

```
keep pid-d_hidp hid19 hsevalue19 hsecost19 mortgageamt19 monthlymortloan19
hhincomemonthly19 children19 hhsize19 hsepayprobs19
```

```
drop if pid==.
```

```
merge 1:1 pid using " C:\UKDA-6614-stata11_se\stata11_se \b_indresp.dta"
```

```
rename b_finnow finsituation19
rename b_save saves19
rename b_saved savesamt19
rename b_fiyrinvinc_dv ivtincome19
rename b_istrtdatd dayofint19
rename b_istrtdatm monthofint19
rename b_istrtdaty yearofint19
rename b_jbsic07_ industry07_19
rename b_smnow smoker19
```

```
rename b_smncigs cigssmoked19
rename b_jbsoc occupation90_19
rename b_jbsemp sfemp19
rename b_age_cr age19
rename b_jshrs hrswrksemp19
rename b_jbttwt commutehrs19
rename b_gor_dv regionus19
rename b_hiqua1_dv education19
rename b_mastat_dv maritalstatus19
rename b_bendis3 severedisableallowance19
rename b_prfitbw incomeweekly19
rename b_prfitba incomeannual19
rename b_ff_jbstat jobstatus19
rename b_jbhrs hrswrk19
rename b_jbot overtime19
rename b_scghq1_dv mental36hlth19
rename b_scghq2_dv mental12hlth19
rename b_scsf1 subjhlthus19
rename b_scflsat1 hlthsat19
rename b_scflsat2 hhincs19
rename b_scflsat7 leistimesat19
rename b_scflsato lifesat19
rename b_health disable19
rename b_vote4 politicalparty19
rename b_nunmpsp_dv unemployedspells19
rename b_nmpsp_dv employedspells19
```

```
keep pid-hhincomemonthly19 employedspells19 unemployedspells19 politicalparty19
yearofint19 jobstatus19 disable19 finsituation19 saves19 savesamt19 ivtincome19 dayofint19
monthofint19 industry07_19 smoker19 cigssmoked19 occupation90_19 sfemp19 age19
hrswrksemp19 commutehrs19 regionus19 education19 maritalstatus19
severedisableallowance19 incomeweekly19 incomeannual19 hrswrk19 overtime19
mental36hlth19 mental12hlth19 subjhlthus19 hlthsat19 hhincs19 leistimesat19 lifesat19
```

```
*** mergin personality data
```

```
merge 1:1 pid using "C:\UKDA-5151-stata8\stata8\oindresp.dta"
rename optrt5a1 rude
rename optrt5a2 forgiving
rename optrt5a3 considerate
rename optrt5c1 throughjob
rename optrt5c2 lazy
rename optrt5c3 efficient
rename optrt5o1 original
rename optrt5o2 valuesart
rename optrt5o3 imaginative
rename optrt5e1 talkative
rename optrt5e2 outgoing
rename optrt5e3 reserved
rename optrt5n1 worrieslots
```



```
rename optrt5n2 nervous
rename optrt5n3 handlesstress
```

```
keep pid-ivtincome21 rude-imaginative
```

```
reshape long hid hoh employeddiffemployers employedspells unemployedspells
unemployedwks jobstatusly neighbourchat yearofint politicalparty meetingpeople
spokeninlastwk age sfemp hhincomemonthly incomeweekly subjhlthus regionus
severedisableallowance industry07_ hsepaybehind hsepaycutbacks hsepayborrow finsituation
finsituationchange hsepayprobs storecreditcards nstorecreditcards creditcardbills owesmoney
hirepurchasedebt personalloandebt creditcarddebt catalogueorderdebt socialloandebt
individualdebt overdraftdebt studentloandebt otherdebt totaldebt over500owed
over1500owed over5000owed over10000owed over100owed soledebt totalsoledebt
percenttotaldebt interestincome loans loanburden hsevalue hsecost mortgageamt
monthlymortloan longtermsaver saves savesamt saveregular ivtincome dayofint monthofint
maritalstatus religion jobstatus hrswrksemp jobsecuritysat hlthsat hhincsat flatsat partnersat
job2sat socialsat leistimesat leisusesat lifelysat wlkswimsprt livesprt cinema theatre eatout
drinkout visitfriends garden diy car eveclass attendgrps volunteer smoker cigssmoked
industry92_ incomeannual region commutehrs children hhsizedisable regdisable income
hhincome hrswrk overtime industry occupation90_ hsetenancy education lifesat mental36hlth
mental12hlth jobsat paysat jobhrssat subjhlth, i(pid) j(year)
```

```
xtset pid year
```

## Step 2: Generating variables

```
gsort pid year
gen hhincomemonthlyyr16=l3.hhincome*(1000/12) if year==19
replace hhincomemonthlyyr16=l4.hhincome*(1000/12) if year==20
gen lhhincomemonthly=log(hhincomemonthly)
gen lhhincomemonthlyyr16=log(hhincomemonthlyyr16)
gen changehhincome16=hhincomemonthly-hhincomemonthlyyr16 if hhincomemonthly>=0
& hhincomemonthly<20000 & hhincomemonthlyyr16>=0 & hhincomemonthlyyr16<20000
gen changelhhincome16=lhhincomemonthly-lhhincomemonthlyyr16 if hhincomemonthly>=0
& hhincomemonthly<20000 & hhincomemonthlyyr16>=0 & hhincomemonthlyyr16<20000
recode hrswrk -9=. -8=0 -2=. -1=.
gen hrswrkyr16=l3.hrswrk if year==19
gen changehrswrk16=hrswrk-hrswrkyr16
```

```
replace lifesat=. if lifesat<1
replace mental36hlth=. if mental36hlth<0
su lifesat mental36hlth
```

```
*** Variable | Obs Mean Std. Dev. Min Max
*** -----+-----
*** lifesat | 70051 5.191532 1.364876 1 7
*** mental36hlth | 67803 11.22598 5.579457 0 36
```

```
egen stdlifesat=std(lifesat)
egen stdmental36hlth=std(mental36hlth)
```

```

gen region1=regionus
recode region1 1=1 2=1 3=1 4=2 5=2 6=2 7=3 8=4 9=4 10=5 11=6 12=7
label define region1 1 "The North" 2 "Midland and East" 3 "London" 4 "The South" 5
"Wales" 6 "Scotland" 7 "Northern Ireland"
label values region1 region1

gen stdlifesatyr16=.
replace stdlifesatyr16=l3.stdlifesat if year==19
gen stdmental36hlthyr16=.
replace stdmental36hlthyr16=l3.stdmental36hlth if year==19

recode age -9=.
su l1.age if age>0 & year==19
gen centage=age-46.75323

recode education .=99
recode region1 .=99
recode jobstatus .=99

recode sex 99=.

gen educationyr16=l3.education if year==19

gen ageyr16=l3.age if year==19

gen region1yr16=l3.region1 if year==19

gen jobstatusyr16=.
replace jobstatusyr16=l3.jobstatus if year==19
gen lhhsizelyr16=.
replace lhhsizelyr16=l3.lhhsizelyr16 if year==19

*** unemployment transitions - 2006/7 to 2009/10
*** some unemployment
gen someunemploymentyr16=.
recode someunemploymentyr16 .=1 if unemployedspells>0 & unemployedspells!=. &
year==19
recode someunemploymentyr16 .=1 if l1.unemployedspells>0 & l1.unemployedspells!=. &
year==19
recode someunemploymentyr16 .=1 if l2.unemployedspells>0 & l2.unemployedspells!=. &
year==19
recode someunemploymentyr16 .=0 if unemployedspells!=. & year==19
recode someunemploymentyr16 .=0 if l1.unemployedspells!=. & year==19
recode someunemploymentyr16 .=0 if l2.unemployedspells!=. & year==19
recode someunemploymentyr16 .=1 if unemployedspells>0 & unemployedspells!=. &
year==20
recode someunemploymentyr16 .=1 if l1.unemployedspells>0 & l1.unemployedspells!=. &
year==20
recode someunemploymentyr16 .=1 if l2.unemployedspells>0 & l2.unemployedspells!=. &
year==20

```

```

recode someunemploymentyr16 .=1 if 13.unemployedspells>0 & 13.unemployedspells!=. &
year==20
recode someunemploymentyr16 .=0 if unemployedspells!=. & year==20
recode someunemploymentyr16 .=0 if 11.unemployedspells!=. & year==20
recode someunemploymentyr16 .=0 if 12.unemployedspells!=. & year==20
recode someunemploymentyr16 .=0 if 13.unemployedspells!=. & year==20

```

### Step 3: Descriptive statistics and multiple imputation

\*\*\* SWB differences - Table 1

```

su 13.lifesat if year==19 & lifesat!=. & 13.lifesat!=., de
su 12.lifesat if year==19 & lifesat!=. & 11.lifesat!=. & 12.lifesat!=., de
su 11.lifesat if year==19 & lifesat!=. & 11.lifesat!=. & 13.lifesat!=., de
su lifesat if year==19 & lifesat!=. & 13.lifesat!=., de

```

```

count if year==19 & 13.lifesat==1 & lifesat!=. & 13.lifesat!=.
count if year==19 & 13.lifesat==2 & lifesat!=. & 13.lifesat!=.
count if year==19 & 13.lifesat==3 & lifesat!=. & 13.lifesat!=.
count if year==19 & 13.lifesat==4 & lifesat!=. & 13.lifesat!=.
count if year==19 & 13.lifesat==5 & lifesat!=. & 13.lifesat!=.
count if year==19 & 13.lifesat==6 & lifesat!=. & 13.lifesat!=.
count if year==19 & 13.lifesat==7 & lifesat!=. & 13.lifesat!=.

```

```

count if year==19 & lifesat==1 & lifesat!=. & 13.lifesat!=.
count if year==19 & lifesat==2 & lifesat!=. & 13.lifesat!=.
count if year==19 & lifesat==3 & lifesat!=. & 13.lifesat!=.
count if year==19 & lifesat==4 & lifesat!=. & 13.lifesat!=.
count if year==19 & lifesat==5 & lifesat!=. & 13.lifesat!=.
count if year==19 & lifesat==6 & lifesat!=. & 13.lifesat!=.
count if year==19 & lifesat==7 & lifesat!=. & 13.lifesat!=.

```

```

gen lifesatyr16=13.lifesat
ttest lifesatyr16 = lifesat if year==19 & lifesat!=. & 13.lifesat!=.

```

```

gen lifesatyr16=13.lifesat
keep if year==19 & stdlifesat!=. & stdlifesatyr16!=.
gen hhsizelyr16=exp(lhhsizelyr16)
su lifesat lifesatyr16
su ageyr16 i.sex hhincomemonthlyyr16 hrswrkyr16 hhsizelyr16 changehrswrk
someunemploymentyr16 changehhincome16
su 1.educationyr16
su b2.educationyr16
su i.region1yr16
su b2.region1yr16
su i.jobstatusyr16
su b2.jobstatusyr16
gen ageyr16sq=ageyr16^2
ttest lifesat = lifesatyr16
gen changelifesat=lifesat-lifesatyr16
bysort sex: ttest changelifesat=0

```

```
bysort educationyr16: ttest changelifesat=0
bysort region1yr16: ttest changelifesat=0
bysort someunemploymentyr16: ttest changelifesat=0
bysort jobstatusyr16: ttest changelifesat=0
```

```
*** Multiple Imputation
```

```
mi set mlong
```

```
*** summary statistics
```

```
su ageyr16 hrswrkyr16 changehrwrk changelhhincome16 someunemploymentyr16
lhsizeyr16 lhhincomemonthlyyr16 educationyr16 region1yr16 jobstatusyr16 sex
mi register imputed ageyr16 ageyr16sq hrswrkyr16 changehrwrk changelhhincome16
someunemploymentyr16 lhhincomemonthlyyr16
set seed 12345
```

```
mi impute chained (pmm, knn(3)) ageyr16 (pmm, knn(3)) ageyr16sq (pmm, knn(3))
hrswrkyr16 (pmm, knn(3)) changehrwrk (pmm, knn(3)) changelhhincome16 (logit)
someunemploymentyr16 (pmm, knn(3)) lhhincomemonthlyyr16 = b1.sex b9.educationyr16
b7.region1yr16 b2.jobstatusyr16 lhsizeyr16, add(5) augment noisily
```

#### Step 4: Regressions

```
*** first centre variables
```

```
cd c:\Temp
```

```
mi xeq 0: su ageyr16 ageyr16sq lhhincomemonthlyyr16 lhsizeyr16 changelhhincome16
changehrwrk hrswrkyr16
```

```
mi xeq: gen centageyr16=ageyr16-46.39654
```

```
mi xeq: gen centageyr16sq=ageyr16sq-2453.17
```

```
mi xeq: gen centlhhincomemonthlyyr16=lhhincomemonthlyyr16-7.732137
```

```
mi xeq: gen centlhsizeyr16=lhsizeyr16-.9311076
```

```
mi xeq: gen centchangelhhincome16=changelhhincome16-.1811137
```

```
mi xeq: gen centchangehrwrk=changehrwrk+0.8749595
```

```
mi xeq: gen centhrswrkyr16=hrswrkyr16-17.81868
```

```
*** summary statistics for SWB variables
```

```
mi xeq: su lifesat
```

```
*** from 2006 to 2010 -need to redo mi with correct age categories and then re-estimate
```

```
*** empty model
```

```
mi estimate: reg stdlifesat stdlifesatyr16 if year==19, cluster(pid)
```

```
*** predicting recession consequences - Table 2
```

```
*** INCOME
```

```
mi estimate: reg changelhhincome16 centageyr16 centageyr16sq i.sex b9.educationyr16
b3.region1yr16 if year==19 & age>0, cluster(pid)
```

```
mibeta changelhhincome16 ageyr16 ageyr16sq i.sex b9.educationyr16 b3.region1yr16 if
year==19 & ageyr16>0, cluster(pid)
```

```
*** UNEMPLOYMENT
```

```
mi estimate: probit someunemploymentyr16 centageyr16 centageyr16sq i.sex
b9.educationyr16 b3.region1yr16 if year==19 & age>0, cluster(pid)
```

```
mibeta someunemploymentyr16 ageyr16 ageyr16sq i.sex b9.educationyr16 b3.region1yr16 if
year==19 & age>0, cluster(pid)
```

```
*** LOSS of WORK HOURS
```

```
mi estimate: reg changehrswrk centageyr16 centageyr16sq i.sex b9.educationyr16
b3.region1yr16 if year==19 & age>0, cluster(pid)
mibeta changehrswrk ageyr16 ageyr16sq i.sex b9.educationyr16 b3.region1yr16 if year==19
& age>0, cluster(pid)
```

```
*** Recession well-being effects - Table 3
```

```
*** t-1 and t no controls
```

```
mi estimate: reg stdlifesat stdlifesatyr16 if year==19 & ageyr16>0, cluster(pid)
```

```
mibeta stdlifesat stdlifesatyr16 if year==19 & ageyr16>0, cluster(pid)
```

```
*** demograhpic variables
```

```
mi estimate: reg stdlifesat stdlifesatyr16 centageyr16 centageyr16sq i.sex b9.educationyr16
b7.region1yr16 if year==19 & ageyr16>0, cluster(pid)
```

```
mibeta stdlifesat stdlifesatyr16 ageyr16 ageyr16sq i.sex b9.educationyr16 b3.region1yr16 if
year==19 & ageyr16>0, cluster(pid)
```

```
*** t-1 and t economic and psych variables - no loss effect for income
```

```
mi estimate: reg stdlifesat stdlifesatyr16 centageyr16 centageyr16sq i.sex b9.educationyr16
b7.region1yr16 b2.jobstatusyr16 centlhhincomemonthlyyr16 hrswrkyr16 centlhhsizeyr16
someunemploymentyr16 changehrswrk centchangelhhincome16, cluster(pid)
```

```
mimrgns
```

```
mimrgns, at(someunemploymentyr16=(0 1))
```

```
mi xeq 0: count if someunemploymentyr16==1
```

```
mimrgns, at(jobstatusyr16=8)
```

```
mi xeq 0: count if jobstatusyr16==8
```

```
mimrgns, at(jobstatusyr16=2 educationyr16=1 centlhhincomemonthlyyr16=1)
```

```
mi xeq 0: count if jobstatusyr16==2 & educationyr16==1 & centlhhincomemonthlyyr16>=1
```

```
mimrgns, at(educationyr16=9 region1yr16=3)
```

```
mi xeq 0: count if educationyr16==9 & region1yr16==3
```

```
mibeta stdlifesat stdlifesatyr16 ageyr16 ageyr16sq i.sex b9.educationyr16 b3.region1yr16
b2.jobstatusyr16 centlhhincomemonthlyyr16 hrswrkyr16 centlhhsizeyr16
someunemploymentyr16 changehrswrk centchangelhhincome16 if year==19 & ageyr16>0,
cluster(pid)
```

```
*** non-imputed regressions
```

```
*** INCOME
```

```
use "C:\Users\Laptop\Documents\Research projects (current)\Political, Policy, and Well-
Being\Great Recession data - before MI V1a.dta",clear
```

```
gen lifesatyr16=l3.lifesat
```

```
keep if year==19 & stdlifesat!=. & stdlifesatyr16!=.
```

```
gen hhsizeyr16=exp(lhhsizeyr16)
```

```
gen ageyr16sq=ageyr16^2
```

```
reg changelhhincome16 ageyr16 ageyr16sq i.sex b9.educationyr16 b3.region1yr16 if
year==19 & age>0, cluster(pid)
```

```
*** UNEMPLOYMENT
```

```
reg someunemploymentyr16 ageyr16 ageyr16sq i.sex b9.educationyr16 b3.region1yr16 if
year==19 & age>0, cluster(pid)
```

```
*** LOSS of WORK HOURS
```

```
reg changehrswrk ageyr16 ageyr16sq i.sex b9.educationyr16 b3.region1yr16 if year==19 &
age>0, cluster(pid)
```

\*\*\* Recession well-being effects - Table 3

\*\*\* t-1 and t no controls

```
reg stdlifesat stdlifesatyr16 if year==19 & ageyr16>0, cluster(pid)
```

\*\*\* demograhpic variables

```
reg stdlifesat stdlifesatyr16 ageyr16 ageyr16sq i.sex b9.educationyr16 b7.region1yr16 if
year==19 & ageyr16>0, cluster(pid)
```

\*\*\* t-1 and t economic and psych variables - no loss effect for income

```
reg stdlifesat stdlifesatyr16 ageyr16 ageyr16sq i.sex b9.educationyr16 b7.region1yr16
b2.jobstatusyr16 lhhincomemonthlyyr16 hrswrkyr16 lhsizeyr16 someunemploymentyr16
changehrswrk changelhhincome16 if year==19 & ageyr16>0, cluster(pid)
```
